# Supplementary material for: Effect of confinement on the adsorption behavior of inorganic and organic ions at aqueous–cyclohexane interfaces: a molecular dynamics study
Source: Royal Society of Chemistry journal article supplement (doi:10.1039/c9cp03078f), 2019-01-01
Supplement: c9cp03078f1.pdf [file c9cp03078f1.pdf]

Supplementary Information for:  
“Effect of Confinement on the Adsorption Behavior of Inorganic  
and Organic Ions at Aqueous-Cyclohexane Interfaces:  
A Molecular Dynamics Study”

*Monir Hosseini Anvari, Phillip Choi\**

*Department of Chemical and Materials Engineering, University of Alberta,  
Edmonton, Alberta T6G 1H9*

\* Corresponding author: [phillip.choi@ualberta.ca](mailto:phillip.choi@ualberta.ca) / Phone: +1-780-492-9018

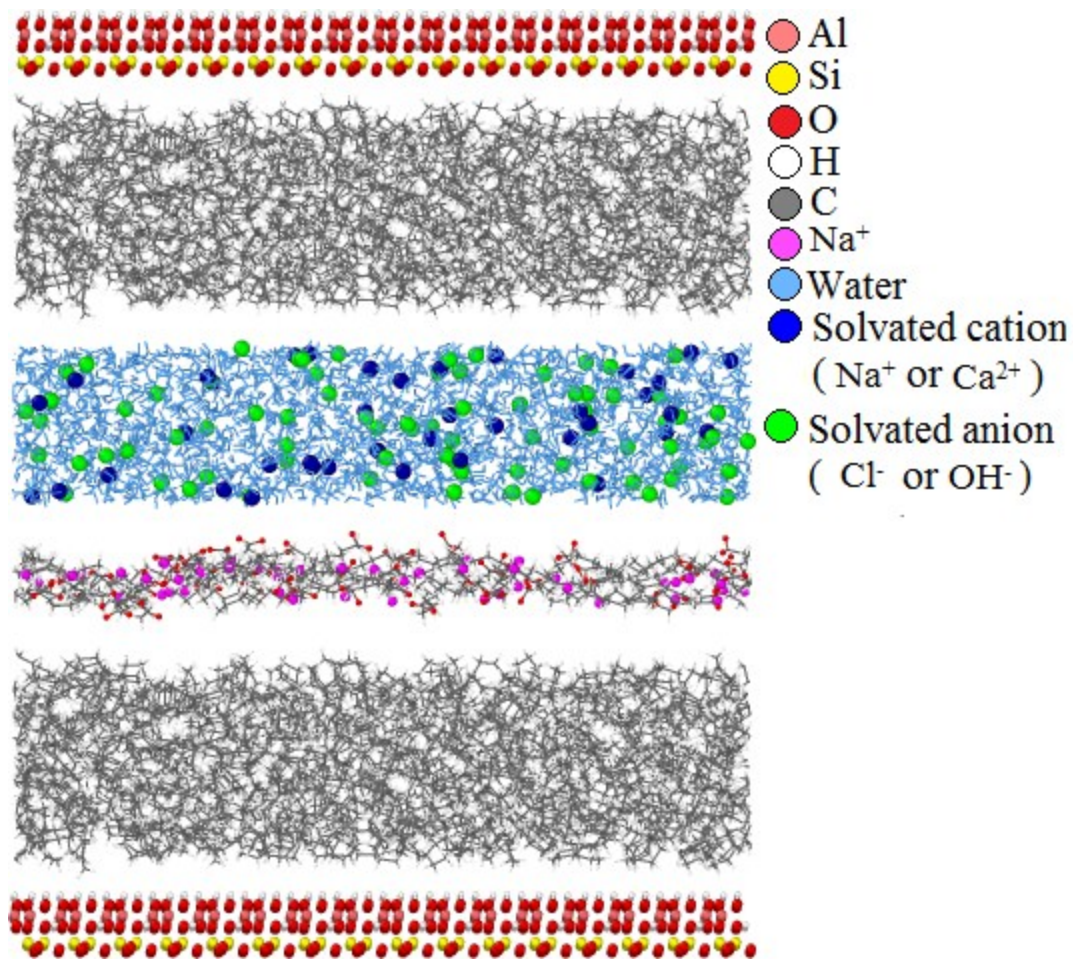

**Figure S1.** The initial structure, composed of kaolinite (001) surfaces (octahedral sheet at the bottom and tetrahedral sheet at the top), cyclohexane phase (1000 molecules, 28 wt% on a dry clay basis), 50 decanoate molecules (with equal number of sodium ions), and the water phase (2000 molecules, 12.12 wt% on a dry clay basis) with 0.5 or 1.0 M concentration of NaCl, NaOH, CaCl<sub>2</sub> or Ca(OH)<sub>2</sub>.

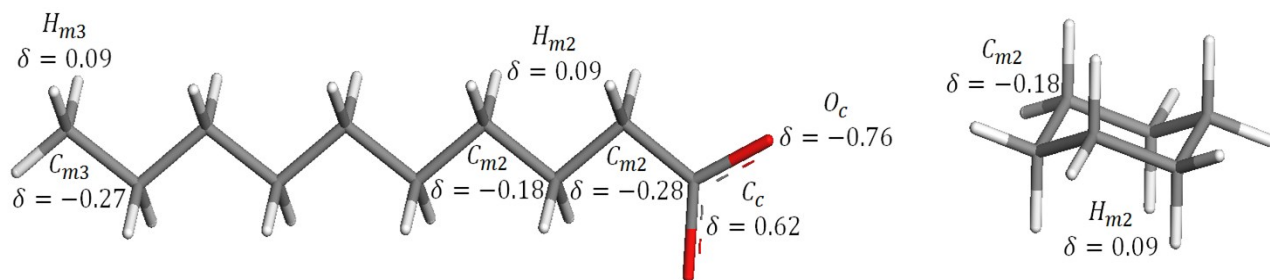

**Table S1.** Non-bond and bond parameters for hydroxide [47], cyclohexane and decanoate [52]

| <b>Non-bonded Interactions (<math>12 - 6</math> LJ)</b> |                                      |                    |
|---------------------------------------------------------|--------------------------------------|--------------------|
| <b>Atom Type</b>                                        | $\epsilon$ (kcal/mol)                | $\sigma$ (Å)       |
| $O_h(O_{hydroxide})$                                    | 0.161                                | 3.670              |
| $O_c(O_{carboxylate})$                                  | 0.120                                | 3.029              |
| $C_c(C_{carboxylate})$                                  | 0.070                                | 3.564              |
| $C_{m2}(C_{methylene-bridge})$                          | 0.056                                | 3.581              |
| $C_{m3}(C_{methyl})$                                    | 0.078                                | 3.653              |
| $H_{m2}(H_{methylene-bridge})$                          | 0.035                                | 2.388              |
| $H_{m3}(H_{methyl})$                                    | 0.024                                | 2.388              |
| <b>Bonded Interactions</b>                              |                                      |                    |
| <b>Harmonic Bond</b> [ $E_b = K_b(r - r_0)^2$ ]         | $K_b$ (kcal/(mol Å <sup>2</sup> ))   | $r_0$ (Å)          |
| $O_h - H_h$                                             | ---                                  | 1.00               |
| $O_c - C_c$                                             | 525.000                              | 1.26               |
| $C_c - C_{m2}$                                          | 200.000                              | 1.52               |
| $C_{m2} - C_{m3}$                                       | 222.500                              | 1.53               |
| $C_{m2} - H_{m2}$                                       | 309.000                              | 1.11               |
| $C_{m3} - H_{m3}$                                       | 322.000                              | 1.11               |
| <b>Harmonic Angle</b> [ $E_b = K_b(r - r_0)^2$ ]        | $K_a$ (kcal/(mol rad <sup>2</sup> )) | $\theta$ (degrees) |
| $O_c - C_c - O_c$                                       | 100.00                               | 128.00             |
| $O_c - C_c - C_{m2}$                                    | 40.00                                | 116.00             |
| $C_c - C_{m2} - C_{m2}$                                 | 52.00                                | 108.00             |
| $C_c - C_{m2} - H_{m2}$                                 | 33.00                                | 109.50             |
| $C_{m2} - C_{m2} - C_{m2}$                              | 58.35                                | 113.60             |
| $C_{m2} - C_{m2} - H_{m2}$                              | 26.50                                | 110.10             |
| $H_{m2} - C_{m2} - H_{m2}$                              | 35.50                                | 109.00             |
| $C_{m2} - C_{m2} - C_{m3}$                              | 58.00                                | 115.00             |
| $H_{m2} - C_{m2} - C_{m3}$                              | 34.60                                | 110.10             |
| $C_{m2} - C_{m3} - H_{m3}$                              | 34.60                                | 110.10             |
| $H_{m3} - C_{m3} - H_{m3}$                              | 35.50                                | 108.40             |

Table S1 - Continued

| <b>Bonded Interactions</b>                                |                 |     |     |
|-----------------------------------------------------------|-----------------|-----|-----|
| <b>Charmm Dihedral</b> $[E_d = K_d(1 + \cos(n\phi - d))]$ | $K_d(kcal/mol)$ | $n$ | $d$ |
| $O_c - C_c - C_{m2} - C_{m2}$                             | 0.050           | 6   | 180 |
| $O_c - C_c - C_{m2} - H_{m2}$                             | 0.05            | 6   | 180 |
| $C_c - C_{m2} - C_{m2} - C_{m2}$                          | 0.065           | 2   | 0   |
| $C_c - C_{m2} - C_{m2} - H_{m2}$                          | 0.195           | 3   | 0   |
| $C_{m2} - C_{m2} - C_{m2} - H_{m2}$                       | 0.195           | 3   | 0   |
| $H_{m2} - C_{m2} - C_{m2} - H_{m2}$                       | 0.220           | 3   | 0   |
| $C_{m2} - C_{m2} - C_{m2} - C_{m3}$                       | 0.151           | 2   | 0   |
| $H_{m2} - C_{m2} - C_{m2} - C_{m3}$                       | 0.180           | 3   | 0   |
| $C_{m2} - C_{m2} - C_{m3} - H_{m3}$                       | 0.160           | 3   | 0   |
| $H_{m2} - C_{m2} - C_{m3} - H_{m3}$                       | 0.160           | 3   | 0   |

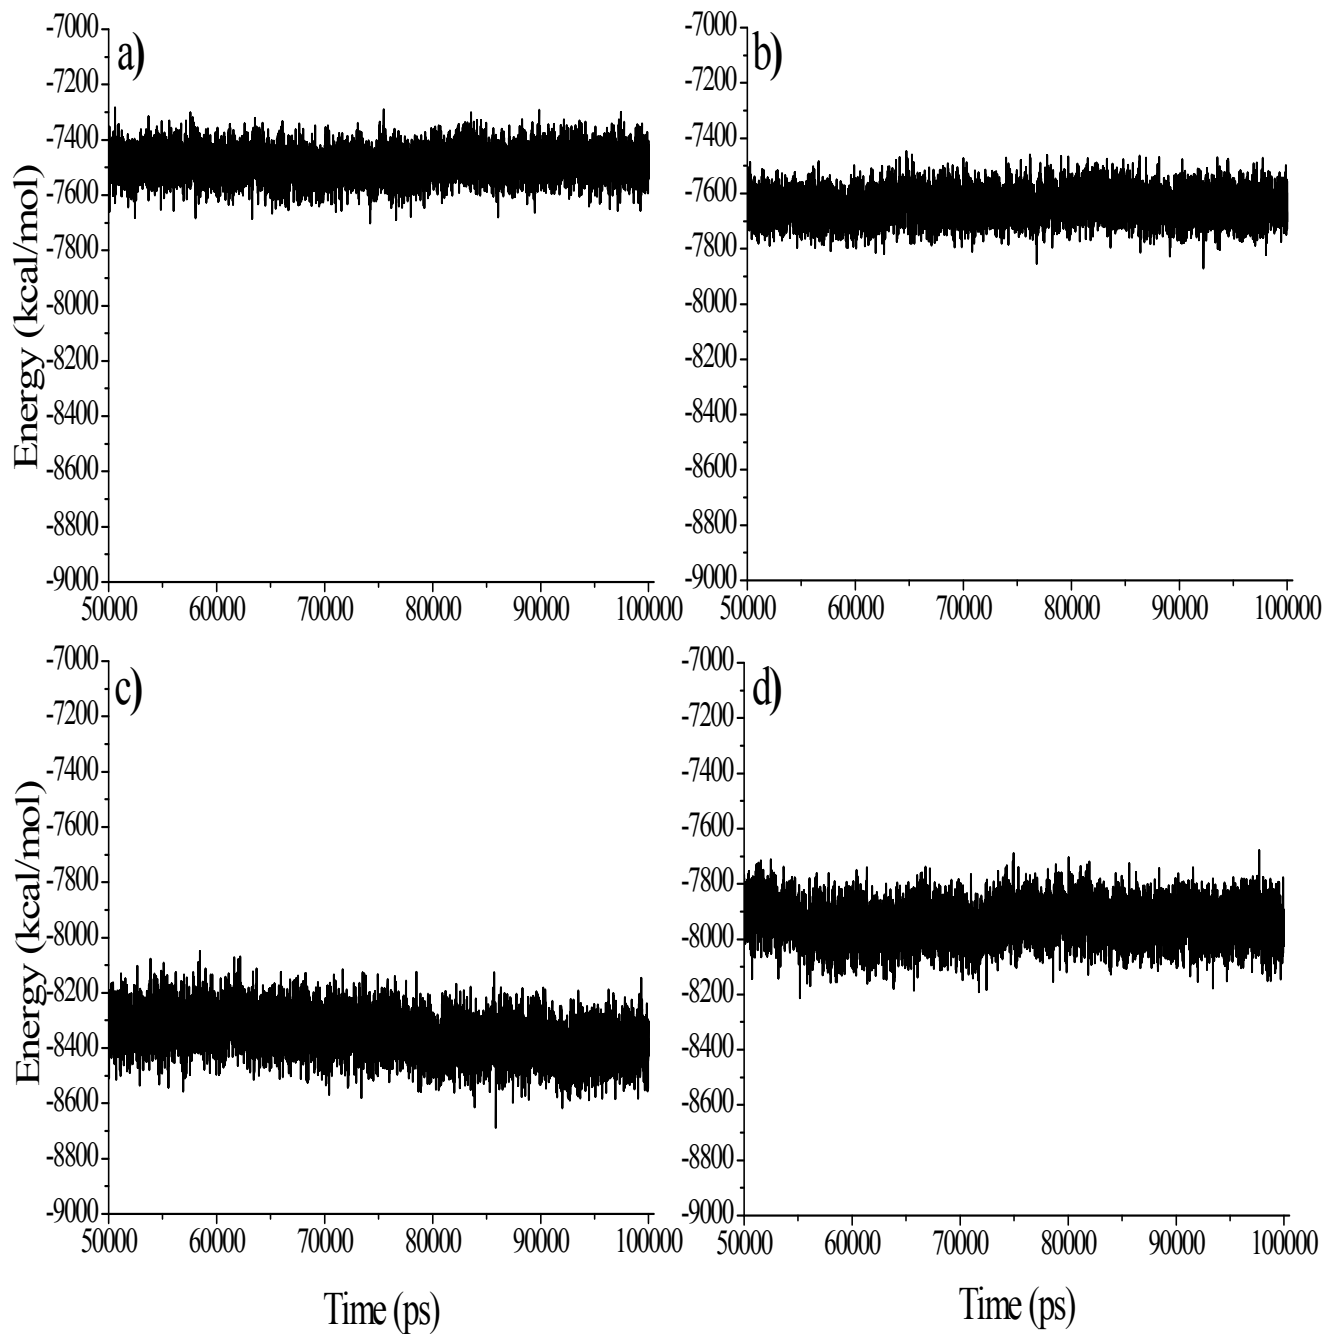

**Figure S2.** Potential-energy profile of the decanoate head-group oxygens in the presence of 1.0 M solution of a) NaCl, b) NaOH, c) CaCl<sub>2</sub> and d) Ca(OH)<sub>2</sub> in between kaolinite surfaces.
